# Supplementary material for: Phenolic Profile, Antioxidant and DNA-Protective Capacity, and Microscopic Characters of Ailanthus altissima Aerial Substances
Source: MDPI journal article supplement (doi:10.3390/plants12040920), 2023-02-17
Supplement: s1 [file s1]

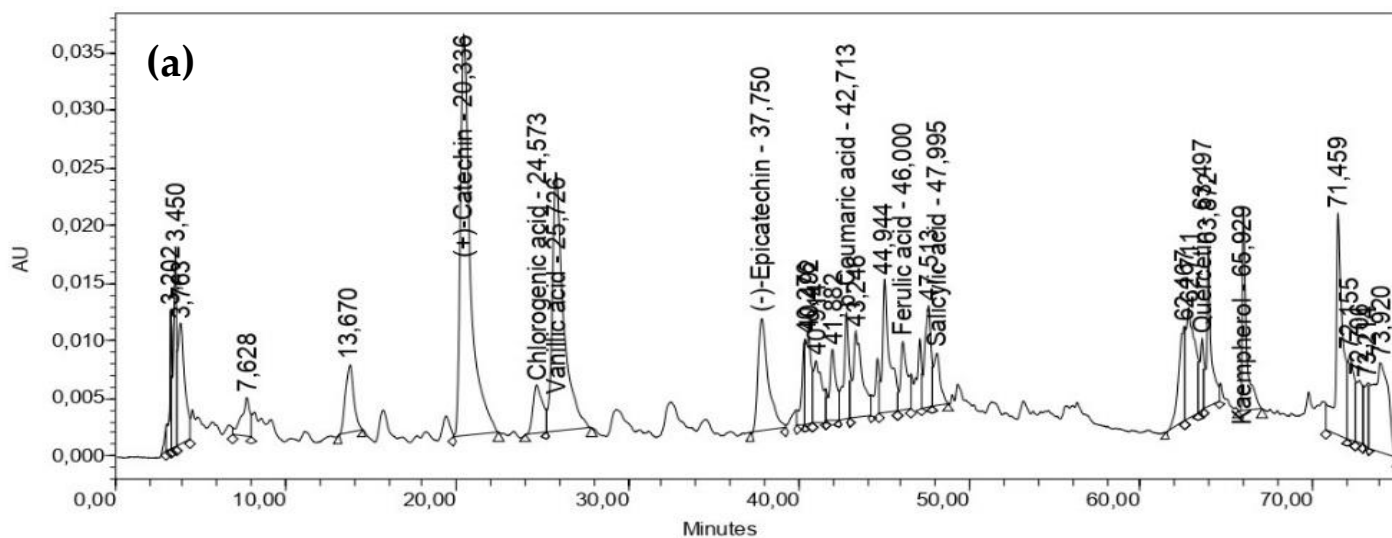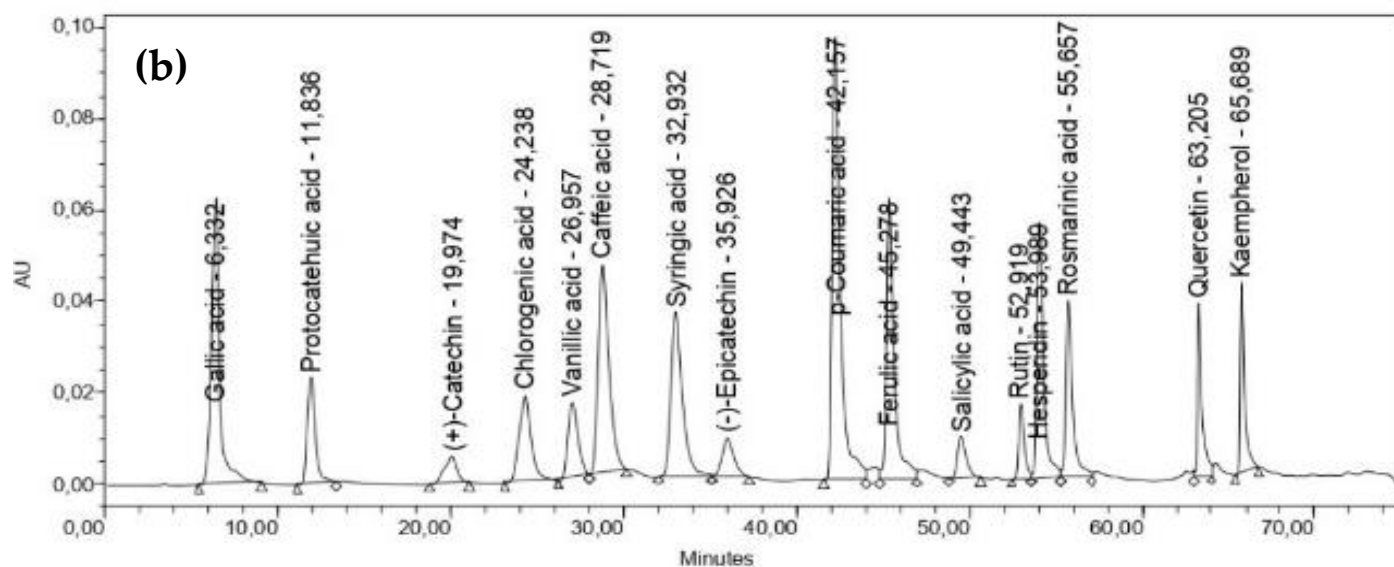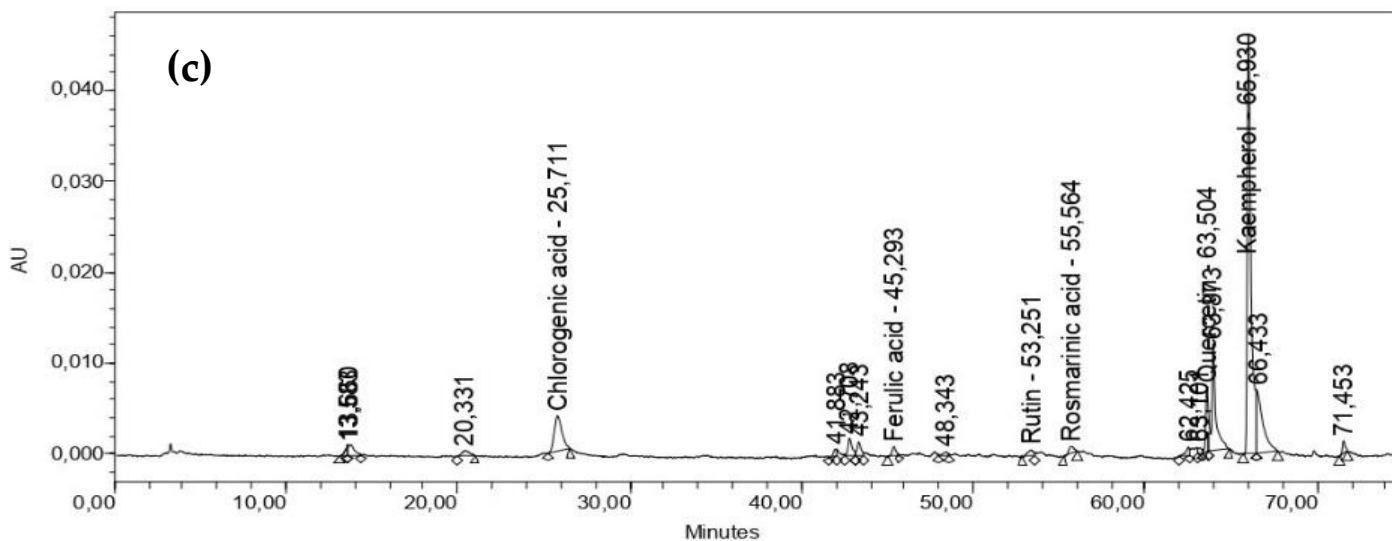

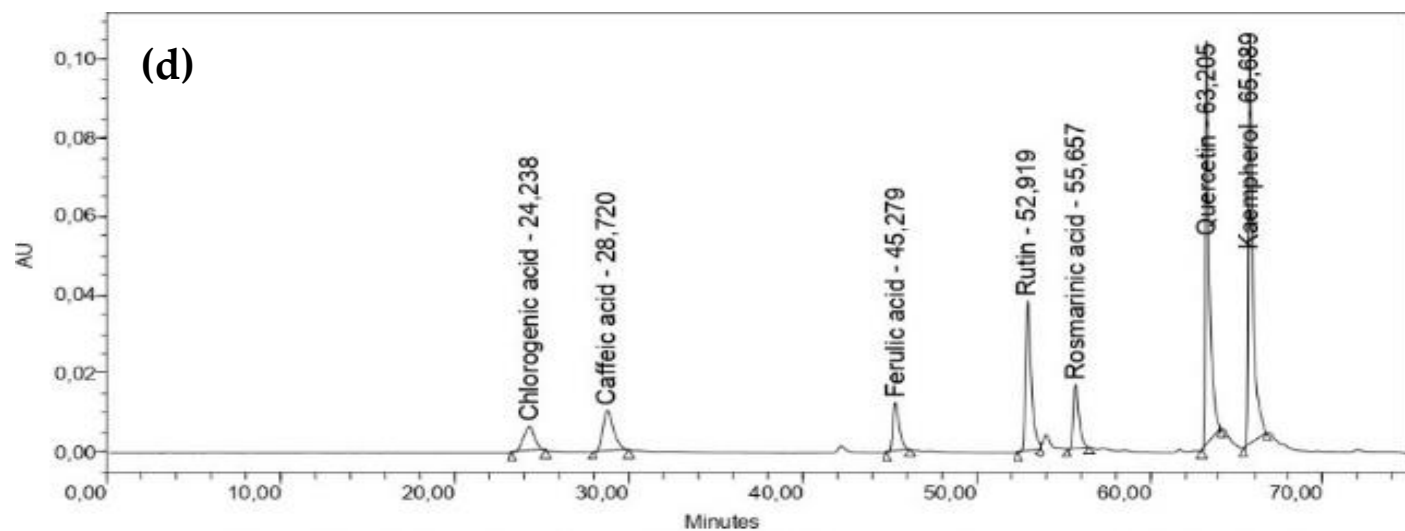

**Figure S1.** HPLC-chromatograms of phenolic compounds and their standards determined at 280 nm (a, b) and 360 nm (c, d) from *Ailanthus altissima* stem bark extracts.
